# Supplementary material for: Preparation of hexagonal prism anatase with high thermal stability from a HTiOF3precursor
Source: Royal Society of Chemistry journal article supplement (doi:10.1039/c6ce02383e), 2016-11-29
Supplement: c6ce02383e1.pdf [file c6ce02383e1.pdf]

## **Preparation of hexagonal prism anatase with highly thermally stability from HTiOF<sub>3</sub> precursor**

Yan Zheng,<sup>a</sup> Xiao Zhang,<sup>b</sup> Ping Yang<sup>a\*</sup>

<sup>a</sup> *School of Material Science and Engineering, University of Jinan, Nanxinzhuanxi RD, 336, Jinan, 250022, P.R. China, E-mail: mse\_yangp@ujn.edu.cn*

<sup>b</sup> *School of Chemistry, University of New South Wales, Sydney 2052, Australia*

Table S1. The XRD analysis and theoretical calculation of HTiOF<sub>3</sub><sup>26</sup>.

| $d_{\text{exp}}$ [Å] | $2\theta_{\text{exp}}$ [°] | $d_{\text{cal}}$ [Å] | $2\theta_{\text{cal}}$ [°] | h | k | l |
|----------------------|----------------------------|----------------------|----------------------------|---|---|---|
| 14.020               | 6.312                      | 14.055               | 6.296                      | 0 | 0 | 2 |
| 23.741               | 3.745                      | 23.691               | 3.752                      | 1 | 0 | 0 |
| 27.602               | 3.229                      | 27.652               | 3.223                      | 1 | 0 | 2 |
| 28.081               | 3.175                      | 28.328               | 3.148                      | 0 | 0 | 4 |
| 34.142               | 2.6249                     | 33.753               | 2.653                      | 1 | 1 | 0 |
| 37.043               | 2.425                      | 37.253               | 2.412                      | 1 | 0 | 4 |
| 42.638               | 2.119                      | 43.067               | 2.099                      | 0 | 0 | 6 |
| 43.764               | 2.067                      | 44.627               | 2.029                      | 1 | 1 | 4 |
| 48.401               | 1.879                      | 48.479               | 1.876                      | 2 | 0 | 0 |
| 49.503               | 1.840                      | 49.738               | 1.832                      | 1 | 0 | 6 |
| 50.620               | 1.802                      | 50.732               | 1.798                      | 2 | 0 | 2 |
| 54.799               | 1.674                      | 54.647               | 1.678                      | 1 | 2 | 0 |
| 55.617               | 1.651                      | 55.806               | 1.646                      | 1 | 1 | 6 |
| 56.859               | 1.618                      | 56.724               | 1.622                      | 2 | 1 | 2 |
| 57.800               | 1.594                      | 57.103               | 6.612                      | 0 | 2 | 4 |
| 59.362               | 1.556                      | 58.601               | 1.574                      | 0 | 0 | 8 |
| 63.024               | 1.474                      | 62.687               | 1.481                      | 1 | 2 | 4 |
| 66.366               | 1.407                      | 66.831               | 1.399                      | 2 | 0 | 6 |
| 68.825               | 1.363                      | 69.364               | 1.354                      | 1 | 1 | 8 |
| 70.758               | 1.330                      | 70.987               | 1.327                      | 2 | 2 | 0 |
| 71.641               | 1.316                      | 71.991               | 1.310                      | 1 | 2 | 6 |
| 76.301               | 1.2470                     | 76.025               | 1.2508                     | 3 | 0 | 0 |
| 77.441               | 1.2314                     | 77.786               | 1.2268                     | 0 | 3 | 2 |
| 78.600               | 1.2161                     | 78.110               | 1.2226                     | 2 | 2 | 4 |

26. P. Liu, Y. Wang, H. Zhang, T. An, H. Yang, Z. Tang, W. Cai and H. Zhao, *small*, 2012, 8, 3664-3667.
